# Supplementary material
Source: PubMed Central journal article supplement (PMC7398649)
Supplement: mmc1.pdf [file mmc1.pdf]

# THE LANCET HIV

## Supplementary appendix

This appendix formed part of the original submission. We post it as supplied by the authors.

Supplement to: Davey DLJ, Bekker L-G, Mashele N, Gorbach P, Coates TJ, Myer L. PrEP retention and prescriptions for pregnant women during COVID-19 lockdown in South Africa. *Lancet HIV* 2020; published online Aug 3. [http://dx.doi.org/10.1016/S2352-3018\(20\)30226-5](http://dx.doi.org/10.1016/S2352-3018(20)30226-5).

**Supplementary tables: Missed visits and drug pick-ups in PrEP in pregnancy study before COVID-19 lockdown and during lockdown, Cape Town, South Africa (n=414 women on PrEP)**

|                                                     | 1-month visit |        |                         |                                     | 3-month visit |        |                         |                                     |
|-----------------------------------------------------|---------------|--------|-------------------------|-------------------------------------|---------------|--------|-------------------------|-------------------------------------|
|                                                     | Attended      | Missed | Not eligible for visit* | % missed visit (of eligible visits) | Attended      | Missed | Not eligible for visit* | % missed visit (of eligible visits) |
| Pre COVID lockdown (August, 2019 to March 27, 2020) | 207           | 84     | 22                      | <b>29%</b>                          | 113           | 80     | 34                      | <b>41%</b>                          |
| During lockdown (March 28 to June 1, 2020)          | 19            | 32     | 50                      | <b>63%</b>                          | 51            | 62     | 74                      | <b>55%</b>                          |

|                 | Total attended | Total missed | % missed visits |
|-----------------|----------------|--------------|-----------------|
| Pre-lockdown    | 320            | 164          | <b>34%</b>      |
| During lockdown | 70             | 94           | <b>57%</b>      |

\*Not eligible for visit because censored before visit or not time for visit at date of analysis; not included in denominator for % missed.

**Bold: p<0.05**
